# Supplementary material
Source: publisher figshare collection journal article supplement (https://springernature.figshare.com/ndownloader/files/13289840)

**Additional file 3(.pdf): Random forest error plot for 2016 torso-mounted accelerometers.** Error plot from random forest models for classifying 6 behavioural states (x0: Rest; x2: Alert; x4: Presenting/Nursing; x5: Locomotion; x6: Comfort Movement; x7: Flipping pup) in 2016 torso-mounted accelerometers (25 Hz) on female grey seals across 500 trees. Out-of-bag error estimates across number of trees shown dark purple line (OOB).

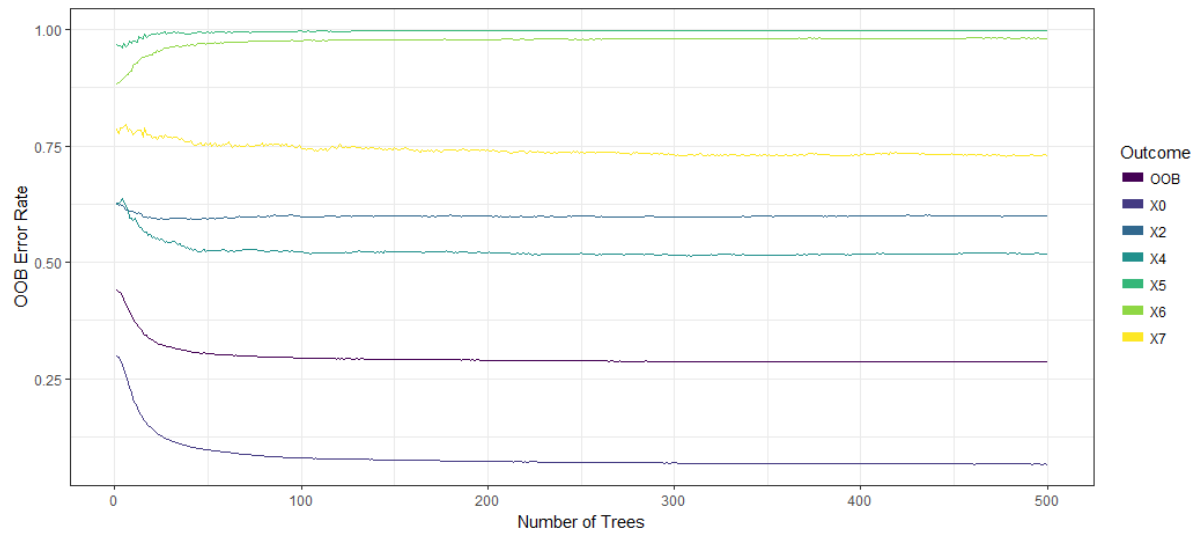

Supplement: Supplementary file 1 [file 13289840]
